# Supplementary material
Source: PubMed Central journal article supplement (PMC6178430)
Supplement: rstb20180043supp1.pdf [file rstb20180043supp1.pdf]

Electronic Supplementary Material for

# Drought-induced Amazonian wildfires instigate a decadal-scale disruption of forest carbon dynamics

Silva<sup>1,2\*</sup> Camila V.J., Aragão<sup>2,3</sup> Luiz E.O.C., Barlow<sup>1</sup> Jos, Espirito-Santo<sup>4</sup> Fernando, Young<sup>1,17</sup> Paul J., Anderson<sup>5,7</sup> Liana O., Berenguer<sup>1,7</sup> Erika, Brasil<sup>8</sup> Izaias, Brown<sup>8,9</sup> I. Foster, Castro<sup>10</sup> Bruno, Farias<sup>10</sup> Renato, Ferreira<sup>11</sup> Joice, França<sup>1,11</sup> Filipe, Graça<sup>12</sup> Paulo M.L.A., Kirsten<sup>12</sup> Letícia, Lopes<sup>2</sup> Aline P., Salimon<sup>13</sup> Cleber, Scaranello<sup>10,14</sup> Marcos, Seixas<sup>11</sup> Marina, Souza<sup>6</sup> Fernanda C., Xaud<sup>16</sup> Haron A. M.

<sup>1</sup>Lancaster Environment Centre, Lancaster University, LA1 4YQ, Lancaster, UK

<sup>2</sup>National Institute for Space Research, Av. dos Astronautas, 1.758, 12227-010 São José dos Campos, Brazil.

<sup>3</sup>College of Life and Environmental Sciences, University of Exeter, EX4 4RJ, UK

<sup>4</sup>Leicester Institute of Space and Earth Observation (LISEO) and Centre for Landscape and Climate Research (CLCR), School of Geography, Geology and Environment, University of Leicester, University Road, Leicester, LE1 7RH

<sup>5</sup>National Centre for Monitoring and Early Warning of Natural Disasters (CEMADEN), São Jose dos Campos, São Paulo, Brazil

<sup>7</sup>Environmental Change Institute, University of Oxford, OX1 3QY, Oxford, UK

<sup>8</sup>Universidade Federal do Acre (UFAC), Parque Zoobotanico, Rio Branco 69915-900, Acre, Brazil

<sup>9</sup>Woods Hole Research Center, 149 Woods Hole Road Falmouth, MA, 02540-1644

<sup>10</sup>Instituto Centro de Vida, Av. Ariosto da Riva, 3473, Centro, 78580-000, Alta Floresta, Brasil

<sup>11</sup>Embrapa Amazônia Oriental, Trav. Dr. Enéas Pinheiro s/no. Caixa Postal, 48 Belém, 66095-100, PA, Brazil

<sup>12</sup>National Institute for Research in Amazonia (INPA), Av. André Araújo, 2936, 69067-375 Manaus, Amazonas, Brazil

<sup>13</sup>Universidade Estadual da Paraíba, Centro de Ciências Biológicas e Sociais Aplicadas (CCBSA), R. Horácio Trajano de Oliveira, 1559 - Cristo Redentor, João Pessoa, 58070-450, Brasil

<sup>14</sup>EMBRAPA Informática Agropecuária, Barão Geraldo, Campinas, SP, Brazil

<sup>15</sup>School of Geography, University of Leeds, Leeds LS2 9JT, UK

<sup>16</sup>Brazilian Agricultural Research Corporation, Embrapa Roraima, PO Box 133, Boa Vista, RR 69.301-970, Brazil

<sup>17</sup>Pentland Centre for Sustainability in Business, Lancaster University, Lancaster, LA1 4YX

Supplementary Material for Drought-induced Amazonian wildfires instigate a decadal-scale disruption of forest carbon dynamics (Silva et al., 2018)

**Method S1: Description of methods applied for MCWD and Burned Area anomaly calculations in figure 1.**

We used re-analysis data and satellite derived products of burned area to characterize the association between burned areas and drought affected regions over the Amazonia. To perform this analysis we calculated the Maximum Climatological Water Deficit (MCWD) anomalies for 2015 based on precipitation and evapotranspiration data from ERA-Interim reanalysis at 1° spatial resolution from 1979 to 2016 [1]. For calculation of burned area anomalies for 2015 we used data from MODIS (MCD64A1 product) at 500 m spatial resolution from 2001 to 2016 [2]. We calculated MCWD as indicated by [3]. Then we aggregated burned area at the MCWD 1° spatial resolution, so we assessed the total burned area for each grid-cell of MCWD. Both MCWD and burned area anomalies were then calculated for 2015 on a pixel-by-pixel basis, as the deviation from the long-term mean calculated from 1979 to 2016 (t) and 2001 to 2016 (t) respectively, normalized by the standard deviation ( $\sigma$ ) as following:

$$\mathbf{X \textit{ Anomaly}} (i, j) = \frac{X(i, j) - X(\mathbf{tx})}{\sigma(\mathbf{tx})(i, j)}$$

Along the time series we plotted the data extracted from plots location and observed coincident peak of BA on the falls of MCWD at all plots region (figure1).

**Table S1: Description of permanent sample plots by region with respective Brazilian federal state, number of plots in burned (BU) and un-burned (UB) area, period of measurements, number of repeated census, Years since last fire disturbance (YSLF), total number of census in each region, plot size in hectare.**

| <b>Region</b>  | <b>BU (N)</b> | <b>UB (N)</b> | <b>Census period</b> | <b>Census (N)</b> | <b>YSLF</b> | <b>Census Total</b> | <b>Plot size (ha)</b> |
|----------------|---------------|---------------|----------------------|-------------------|-------------|---------------------|-----------------------|
| East (PA)      | 4             | 6             | 2010-2016            | 3                 | 16-31       | 30                  | 0.25                  |
| Central (AM)   | 11            | 6             | 2015-2016            | 2                 | 0.75 – 1.25 | 34                  | 0.25                  |
| North (RR)     | 6             | 3             | 2015                 | 1                 | 12-17       | 9                   | 0.25                  |
| Southeast (MT) | 4             | 4             | 2009-2017            | 7                 | 4-12        | 56                  | 0.25                  |
| Southwest (AC) | 10            | 10            | 2009-2016            | 3                 | 0.75-11     | 60                  | 0.25; 1               |
| Total          | 35            | 29            | 2009-2017            | 16                | 0.75-31     | 189                 | –                     |

**Table S2: Summary of mean values of TAGB stock and dynamics parameters, mortality (M), wood productivity (Wp) and Net TAGB, with s.d. values between parentheses for burned and unburned plots.**

| Type                | Plots  | Region    | Census period | Census (N) | YSLF   | TAGB (Mg ha <sup>-1</sup> ) | M ((Mg ha <sup>-1</sup> y <sup>-1</sup> )) | Wp (Mg ha <sup>-1</sup> y <sup>-1</sup> ) | Net TAGB (Mg ha <sup>-1</sup> y <sup>-1</sup> ) |
|---------------------|--------|-----------|---------------|------------|--------|-----------------------------|--------------------------------------------|-------------------------------------------|-------------------------------------------------|
| <b>Burned plots</b> | AFL_2a | southeast | 2009-2017     | 7          | 4-12   | 226.3 (3.7)                 | 8.4(5.4)                                   | 10.3(1.6)                                 | 1.8(4.0)                                        |
|                     | AFL_2b | southeast | 2009-2017     | 7          | 4-12   | 198.0 (11.3)                | 4.1(5.9)                                   | 8.3(1.8)                                  | 4.1(6.4)                                        |
|                     | AFL_2c | southeast | 2009-2017     | 7          | 4-12   | 209.0 (7.5)                 | 5.1(6.2)                                   | 7.6(1.5)                                  | 2.5(6.2)                                        |
|                     | AFL_2d | southeast | 2009-2017     | 7          | 4-12   | 161.2 (6.7)                 | 8(6.3)                                     | 6.5(1.4)                                  | -1.4(6.4)                                       |
|                     | BOL_4  | southwest | 2011-2016     | 3          | 0.75-6 | 277.2(14.4)                 | 9.4(11.7)                                  | 8.1(0.4)                                  | -1.2(11.2)                                      |
|                     | BOL_5  | southwest | 2011-2016     | 3          | 0.75-6 | 113.0(22.4)                 | 12.9(9.8)                                  | 3.3(1.3)                                  | -9.5(11.1)                                      |
|                     | BOL_6  | southwest | 2011-2016     | 3          | 0.75-6 | 186.5(12.9)                 | 8.7(9.8)                                   | 8.7(0.3)                                  | -0.005(10.1)                                    |
|                     | HUM_2a | southwest | 2009-2016     | 4          | 4-11   | 217.4(10.8)                 | 3.5(2.0)                                   | 8.4(1.3)                                  | 4.9(3.0)                                        |
|                     | HUM_2b | southwest | 2009-2016     | 4          | 4-11   | 203.1(5.7)                  | 3.5(4.3)                                   | 7.1(2.0)                                  | 3.6(5.1)                                        |
|                     | HUM_2c | southwest | 2009-2016     | 4          | 4-11'  | 179.4(6.4)                  | 9.7(11.4)                                  | 7.5(2.2)                                  | -2.2(9.6)                                       |
|                     | HUM_2d | southwest | 2009-2016     | 4          | 4-11   | 190.1(19.7)                 | 19.3(25.0)                                 | 8.4(1.9)                                  | -10.8(23.5)                                     |
|                     | MUC_10 | north     | 2015          | 1          | 17     | 157.5                       |                                            |                                           |                                                 |
|                     | MUC_11 | north     | 2015          | 1          | 17     | 203.1                       |                                            |                                           |                                                 |
|                     | MUC_13 | north     | 2015          | 1          | 12     | 162                         |                                            |                                           |                                                 |

Supplementary Material for Drought-induced Amazonian wildfires instigate a decadal-scale disruption of forest carbon dynamics (Silva et al., 2018)

| Type | Plots  | Region    | Census period | Census (N) | YSLF      | TAGB (Mg ha <sup>-1</sup> ) | M ((Mg ha <sup>-1</sup> y <sup>-1</sup> )) | Wp (Mg ha <sup>-1</sup> y <sup>-1</sup> ) | Net TAGB (Mg ha <sup>-1</sup> y <sup>-1</sup> ) |
|------|--------|-----------|---------------|------------|-----------|-----------------------------|--------------------------------------------|-------------------------------------------|-------------------------------------------------|
|      | MUC_14 | north     | 2015          | 1          | 12        | 143.6                       |                                            |                                           |                                                 |
|      | MUC_6  | north     | 2015          | 1          | 17        | 145.3                       |                                            |                                           |                                                 |
|      | MUC_7  | north     | 2015          | 1          | 17        | 55.4                        |                                            |                                           |                                                 |
|      | NOC_4  | central   | 2015-2016     | 2          | 0.75-1.25 | 242.9(13.7)                 | 28.1                                       | 9.6                                       | -18.4                                           |
|      | NOC_5  | central   | 2015-2016     | 2          | 0.75-1.25 | 332.6(7.4)                  | 22                                         | 12                                        | -10                                             |
|      | NOC_6  | central   | 2015-2016     | 2          | 0.75-1.25 | 235.8(17.9)                 | 31.4                                       | 7.2                                       | -24.1                                           |
|      | NOC_7  | central   | 2015-2016     | 2          | 0.75-1.25 | 316.8(9.2)                  | 22.2                                       | 9.8                                       | -12.3                                           |
|      | NOC_8  | central   | 2015-2016     | 2          | 0.75-1.25 | 316.4(11.8)                 | 21.6                                       | 5.4                                       | -16.1                                           |
|      | NOC_9  | central   | 2015-2016     | 2          | 0.75-1.25 | 275.2(2.3)                  | 12.7                                       | 10                                        | -2.7                                            |
|      | RCM_4  | southwest | 2011-2016     | 3          | 0.75-6    | 198.5(14.7)                 | 13.3(2.4)                                  | 9.8(0.8)                                  | -3.5(3.2)                                       |
|      | RCM_5  | southwest | 2011-2016     | 3          | 0.75-6    | 215.9(3.7)                  | 3.1(2.8)                                   | 7.9(5.1)                                  | 4.7(7.9)                                        |
|      | RCM_6  | southwest | 2011-2016     | 3          | 0.75-6    | 190(24.3)                   | 16.6(7.7)                                  | 11.5(3.3)                                 | -5.1(11.1)                                      |
|      | TIC_4  | central   | 2015-2016     | 2          | 0.75-1.25 | 278.1(1.9)                  | 8.8                                        | 11.7                                      | 2.9                                             |
|      | TIC_5  | central   | 2015-2016     | 2          | 0.75-1.25 | 173.8(11.7)                 | 27.1                                       | 11.5                                      | -15.6                                           |
|      | TIC_6  | central   | 2015-2016     | 2          | 0.75-1.25 | 185.9(41.9)                 | 64.6                                       | 5.7                                       | -58.8                                           |
|      | TIC_7  | central   | 2015-2016     | 2          | 0.75-1.25 | 204.6(3.3)                  | 12                                         | 7.6                                       | -4.3                                            |
|      | TIC_8  | central   | 2015-2016     | 2          | 0.75-1.25 | 190.2(20.3)                 | 36.6                                       | 8.8                                       | -27.8                                           |

Supplementary Material for Drought-induced Amazonian wildfires instigate a decadal-scale disruption of forest carbon dynamics (Silva et al., 2018)

| Type                  | Plots  | Region    | Census period | Census (N) | YSLF  | TAGB (Mg ha <sup>-1</sup> ) | M ((Mg ha <sup>-1</sup> y <sup>-1</sup> ) | Wp (Mg ha <sup>-1</sup> y <sup>-1</sup> ) | Net TAGB (Mg ha <sup>-1</sup> y <sup>-1</sup> ) |
|-----------------------|--------|-----------|---------------|------------|-------|-----------------------------|-------------------------------------------|-------------------------------------------|-------------------------------------------------|
|                       | TPJ_10 | east      | 2010-2014     | 2          | 12-16 | 469.9(36)                   | 18.5                                      | 6.1                                       | -12.3                                           |
|                       | TPJ_7  | east      | 2010-2014     | 2          | 25-29 | 307.9(49.5)                 | 23.3                                      | 6.8                                       | -16.4                                           |
|                       | TPJ_8  | east      | 2010-2016     | 3          | 25-31 | 219(3.8)                    | 3.5(3.0)                                  | 5.1(2.2)                                  | 1.6(0.7)                                        |
|                       | TPJ_9  | east      | 2010-2016     | 3          | 25-31 | 161.3(13.1)                 | 6.3(6.6)                                  | 4.9(0.8)                                  | -1.4(5.9)                                       |
| <b>Unburned plots</b> | AFL_1a | southeast | 2009-2017     | 7          |       | 264.3(9)                    | 3.9(1.5)                                  | 7(2.1)                                    | 3.1(1.8)                                        |
|                       | AFL_1b | southeast | 2009-2017     | 7          |       | 209.4(15.6)                 | 6.3(8.3)                                  | 5.6(1.8)                                  | -0.7(8.7)                                       |
|                       | AFL_1c | southeast | 2009-2017     | 7          |       | 292.5(4.7)                  | 6.1(4)                                    | 5.9(1.7)                                  | -0.2(4.6)                                       |
|                       | AFL_1d | southeast | 2009-2017     | 7          |       | 213.6(17.3)                 | 6.8(8.2)                                  | 5.4(1.6)                                  | -1.5(8.6)                                       |
|                       | BOL_1  | southwest | 2011-2016     | 3          |       | 141.9(11.6)                 | 1(0.1)                                    | 6(0.7)                                    | 4.9(0.5)                                        |
|                       | BOL_2  | southwest | 2011-2016     | 3          |       | 236.1(12.8)                 | 4.7(3.8)                                  | 9.4(0.9)                                  | 4.7(2.9)                                        |
|                       | BOL_3  | southwest | 2011-2016     | 3          |       | 249.5(14.4)                 | 1.5(1.2)                                  | 6.7(1.2)                                  | 5.2(2.5)                                        |
|                       | HUM_1a | southwest | 2009-2016     | 4          |       | 297.2(7.6)                  | 4.2(5.5)                                  | 7.7(1.2)                                  | 3.5(6.8)                                        |
|                       | HUM_1b | southwest | 2009-2016     | 4          |       | 269.9(25.8)                 | 1.4(1.7)                                  | 10.4(1.6)                                 | 9(2.4)                                          |
|                       | HUM_1c | southwest | 2009-2016     | 4          |       | 263.4(69.1)                 | 15.2(17.8)                                | 8(4.5)                                    | -7.3(20.9)                                      |
|                       | HUM_1d | southwest | 2009-2016     | 4          |       | 258.5(14.5)                 | 1.9(1)                                    | 6.9(2)                                    | 5(1)                                            |
|                       | MUC_1  | north     | 2015          | 1          |       | 332.8                       |                                           |                                           |                                                 |

Supplementary Material for Drought-induced Amazonian wildfires instigate a decadal-scale disruption of forest carbon dynamics (Silva et al., 2018)

| Type | Plots | Region    | Census period | Census (N) | YSLF | TAGB (Mg ha <sup>-1</sup> ) | M ((Mg ha <sup>-1</sup> y <sup>-1</sup> )) | Wp (Mg ha <sup>-1</sup> y <sup>-1</sup> ) | Net TAGB (Mg ha <sup>-1</sup> y <sup>-1</sup> ) |
|------|-------|-----------|---------------|------------|------|-----------------------------|--------------------------------------------|-------------------------------------------|-------------------------------------------------|
|      | MUC_2 | north     | 2015          | 1          |      | 195.3                       |                                            |                                           |                                                 |
|      | MUC_3 | north     | 2015          | 1          |      | 287.9                       |                                            |                                           |                                                 |
|      | NOC_1 | central   | 2015-2016     | 2          |      | 311.1(0.6)                  | 8.7                                        | 10                                        | 1.2                                             |
|      | NOC_2 | central   | 2015-2016     | 2          |      | 314.2(5.7)                  | 1.5                                        | 9.8                                       | 8.3                                             |
|      | NOC_3 | central   | 2015-2016     | 2          |      | 216.6(2.3)                  | 6                                          | 9.4                                       | 3.4                                             |
|      | RCM_1 | southwest | 2011-2016     | 3          |      | 339.3(13.6)                 | 2(2.7)                                     | 10.8(1.7)                                 | 8.7(4.4)                                        |
|      | RCM_2 | southwest | 2011-2016     | 3          |      | 104.7(7.7)                  | 1.8(0.7)                                   | 4.7(0.1)                                  | 2.8(0.5)                                        |
|      | RCM_3 | southwest | 2011-2016     | 3          |      | 215.5(4.8)                  | 1.1(0.8)                                   | 5(0.4)                                    | 3.8(1.3)                                        |
|      | TIC_1 | central   | 2015-2016     | 2          |      | 213.4(3.6)                  | 2.2                                        | 7.5                                       | 5.2                                             |
|      | TIC_2 | central   | 2015-2016     | 2          |      | 165.1(3.3)                  | 14.7                                       | 10.4                                      | -4.3                                            |
|      | TIC_3 | central   | 2015-2016     | 2          |      | 163.8(4.4)                  | 12.6                                       | 6.5                                       | -6.1                                            |
|      | TPJ_1 | east      | 2010-2016     | 3          |      | 371.6(30.5)                 | 15.9(9.5)                                  | 3.8(0.8)                                  | -12.2(10.3)                                     |
|      | TPJ_2 | east      | 2010          | 1          |      | 231.8                       |                                            |                                           |                                                 |
|      | TPJ_3 | east      | 2010-2016     | 3          |      | 204(10.2)                   | 4.5(2)                                     | 8.2(2.8)                                  | 3.7(0.7)                                        |
|      | TPJ_4 | east      | 2010-2016     | 3          |      | 313.1(10.6)                 | 4.6(5)                                     | 5(1.2)                                    | 0.3(6.3)                                        |
|      | TPJ_5 | east      | 2010-2016     | 3          |      | 333.7(15.1)                 | 9.8(0.04)                                  | 4.9(0.4)                                  | -5(0.3)                                         |
|      | TPJ_6 | east      | 2010          | 1          |      | 518.4                       |                                            |                                           |                                                 |

Supplementary Material for Drought-induced Amazonian wildfires instigate a decadal-scale disruption of forest carbon dynamics (Silva et al., 2018)

**Table S3. Mean difference ( $\Delta$ ) in % ( $\pm$ s.e.) between each burned plot and unburned mean values of Increment and Recruitment. Positive values means higher values for burned plots than for unburned plots.**

| YSLF categories | Census year                        | TAGB Dynamics           |                           |    |
|-----------------|------------------------------------|-------------------------|---------------------------|----|
|                 |                                    | Increment<br>$\Delta$ % | Recruitment<br>$\Delta$ % | N  |
| (0.75 to 4)     | 2009; 2011;<br>2014; 2015;<br>2016 | 6.4(8.2)                | 37.9(36.0)                | 17 |
| (5 to 8)        | 2010; 2011;<br>2012; 2013;<br>2016 | 25.2(8.1)               | 72.5(23.4)                | 26 |
| (9 to 11)       | 2014; 2015;<br>2016                | 15(13.9)                | 41.4(16.4)                | 12 |
| (12 to 31)      | 2010; 2014;<br>2016; 2017          | 6.3(9.5)                | 35.7(30.9)                | 10 |



**Tables S4. Summary of LOESS model's parameters**

| <b>LOESS model for TAGB ~ Years since last fire</b> |            |
|-----------------------------------------------------|------------|
|                                                     |            |
| Number of Observations: 100                         |            |
| Equivalent Number of Parameters: 4.73               |            |
| Residual Standard Error: 21.16                      |            |
| Trace of smoother matrix: 5.17 (exact)              |            |
|                                                     |            |
| Control settings:                                   |            |
| span : 0.75                                         |            |
| degree : 2                                          |            |
| family : gaussian                                   |            |
| surface : interpolate                               | cell = 0.2 |
| normalize: TRUE                                     |            |
| parametric: FALSE                                   |            |
| drop.square: FALSE                                  |            |

| <b>LOESS model for Mortality ~ Years since last fire</b> |  |
|----------------------------------------------------------|--|
|                                                          |  |
| Number of Observations: 65                               |  |
| Equivalent Number of Parameters: 5.34                    |  |
| Residual Standard Error: 452.6                           |  |
| Trace of smoother matrix: 5.86 (exact)                   |  |
|                                                          |  |

|                       |            |
|-----------------------|------------|
| Control settings:     |            |
| span : 0.75           |            |
| degree : 2            |            |
| family : gaussian     |            |
| surface : interpolate | cell = 0.2 |
| normalize: TRUE       |            |
| parametric: FALSE     |            |
| drop.square: FALSE    |            |

|                                                                  |            |
|------------------------------------------------------------------|------------|
| <b>LOESS model for Wood Productivity ~ Years since last fire</b> |            |
|                                                                  |            |
| Number of Observations: 65                                       |            |
| Equivalent Number of Parameters: 5.34                            |            |
| Residual Standard Error: 34.34                                   |            |
| Trace of smoother matrix: 5.86 (exact)                           |            |
|                                                                  |            |
| Control settings:                                                |            |
| span : 0.75                                                      |            |
| degree : 2                                                       |            |
| family : gaussian                                                |            |
| surface : interpolate                                            | cell = 0.2 |
| normalize: TRUE                                                  |            |
| parametric: FALSE                                                |            |
| drop.square: FALSE                                               |            |

|                                                         |            |
|---------------------------------------------------------|------------|
| <b>LOESS model for Net TAGB ~ Years since last fire</b> |            |
|                                                         |            |
| Number of Observations: 65                              |            |
| Equivalent Number of Parameters: 5.34                   |            |
| Residual Standard Error: 953.2                          |            |
| Trace of smoother matrix: 5.86 (exact)                  |            |
|                                                         |            |
| Control settings:                                       |            |
| span : 0.75                                             |            |
| degree : 2                                              |            |
| family : gaussian                                       |            |
| surface : interpolate                                   | cell = 0.2 |
| normalize: TRUE                                         |            |
| parametric: FALSE                                       |            |
| drop.square: FALSE                                      |            |

**Figure S1: The General Additive Mixed Model validation graphs for TAGB, mortality, Wp and Net TAGB: Residuals homogeneity, normality and independency.**

## TAGB

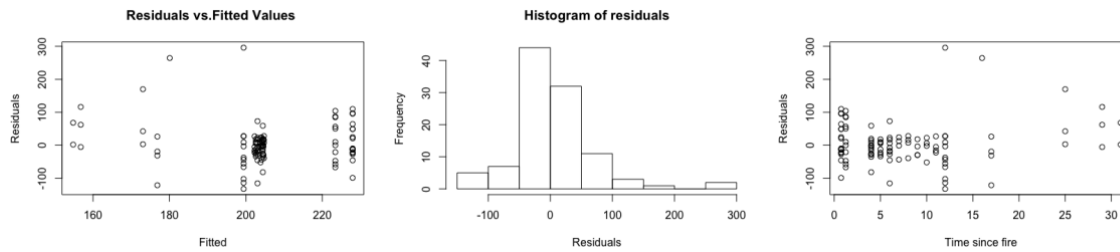

## Mortality

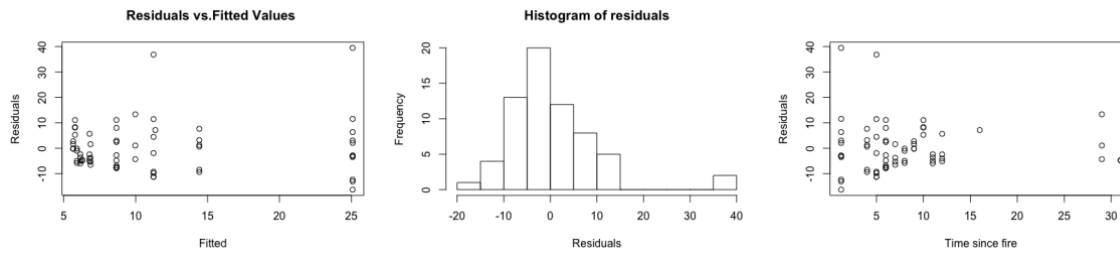

## Wp

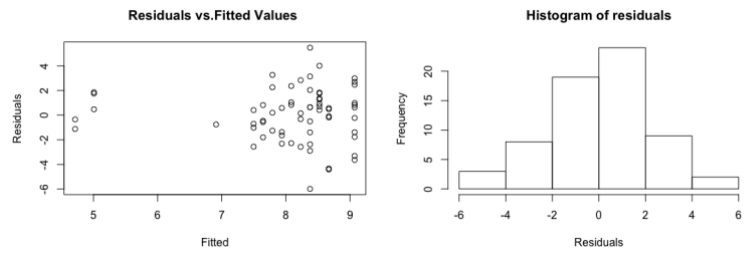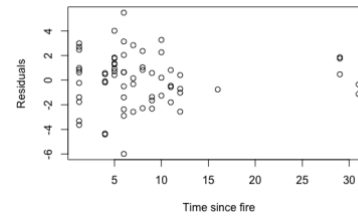

## Net TAGB

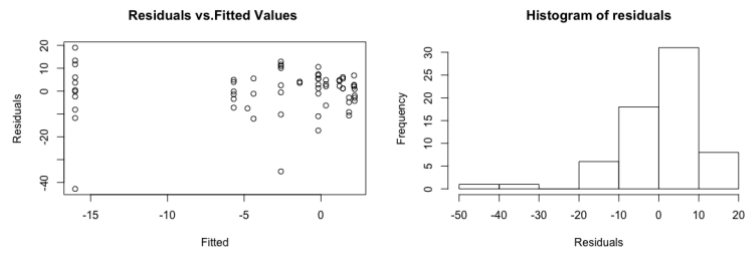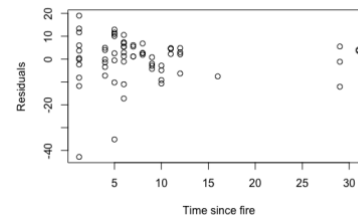

**Figure S2: Probability density function of Stem Recruitment ( $\% \text{ y}^{-1}$ ) by Wood Density classes (WD: 0.1-0.49; 0.5 -0.69;  $> 0.7 \text{ g cm}^{-3}$ ) in lines and years since last fire (YSLF) classes (0.75-4; 5-8; 9-11; 12-31 years) in columns. Dashed lines represent median, red colour for burned and blue for unburned forests. Significance of Wilcoxon test represented by: \*  $p < 0.05$  and \*\*  $p < 0.10$ .**

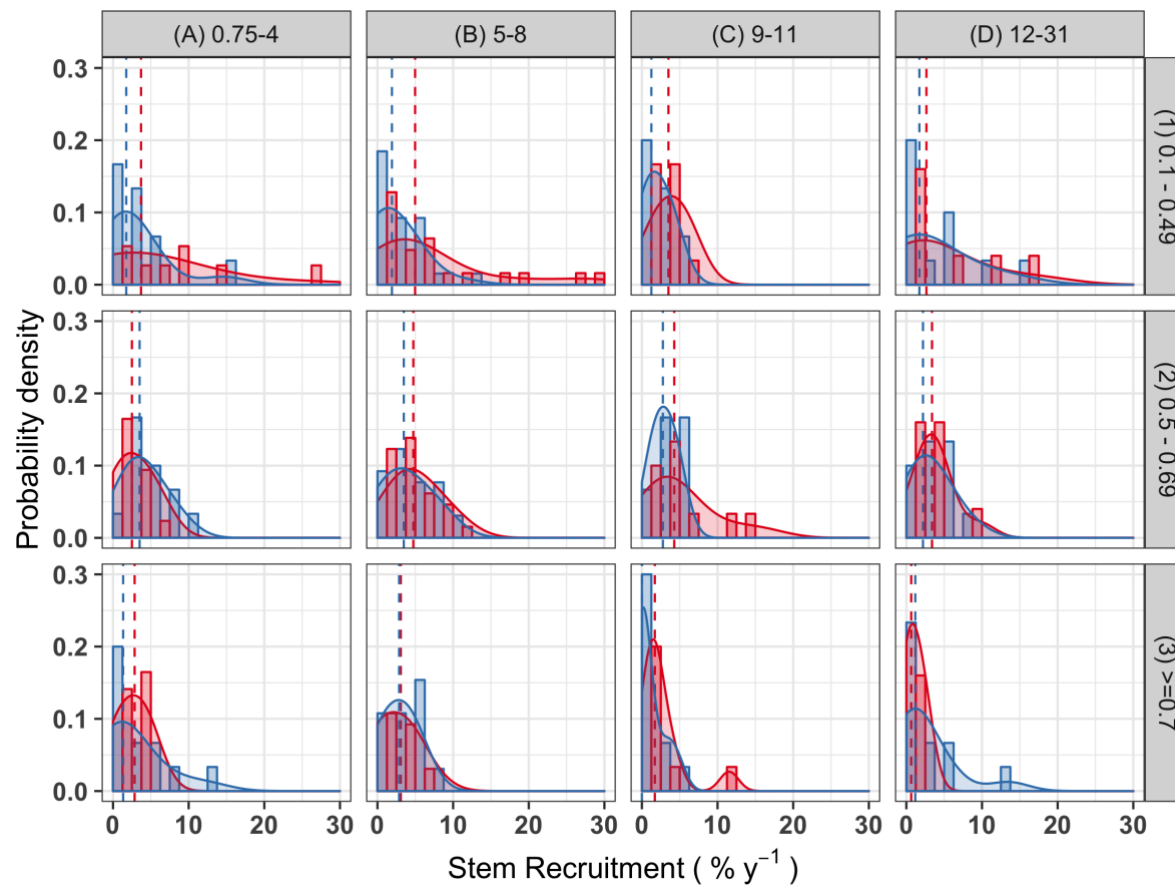

Figure S3: LOESS fit for percent difference of Recruitment and Growth in relation to unburned forest.

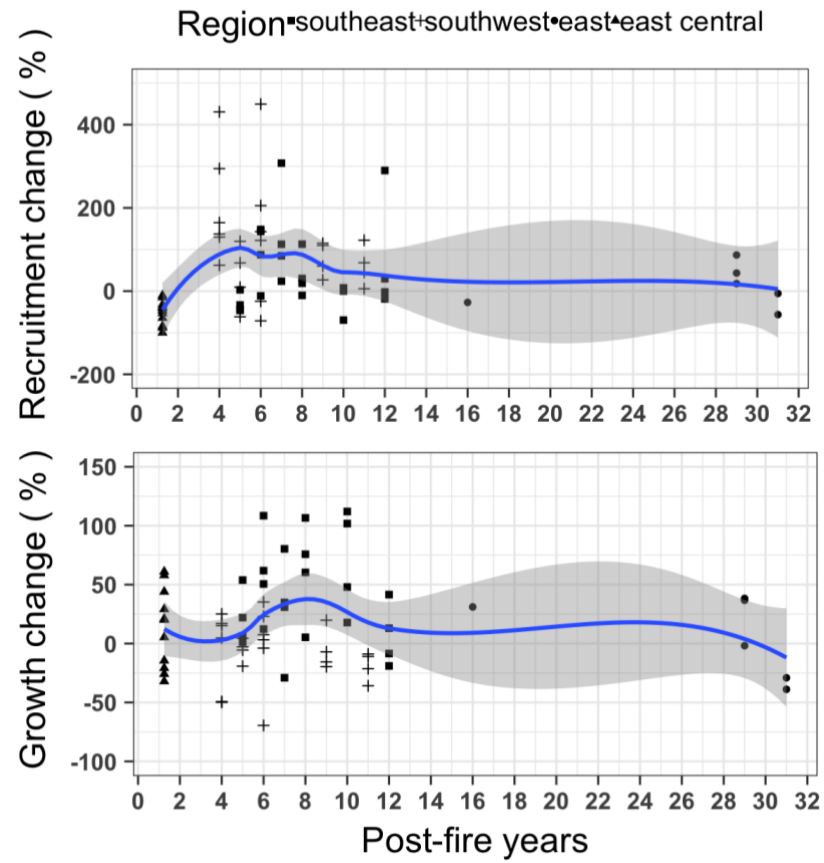

## References:

1. Dee DP *et al.* 2011 The ERA-Interim reanalysis: Configuration and performance of the data assimilation system. *Q. J. R. Meteorol. Soc.* **137**, 553–597. (doi:10.1002/qj.828)
2. Giglio L, van der Werf GR, Randerson JT, Collatz GJ, Kasibhatla P. 2006 Global estimation of burned area using MODIS active fire observations. *Atmos. Chem. Phys.* **6**, 957–974. (doi:10.5194/acp-6-957-2006)
3. Aragão LEOC, Malhi Y, Roman-Cuesta RM, Saatchi S, Anderson LO, Shimabukuro YE. 2007 Spatial patterns and fire response of recent Amazonian droughts. *Geophys. Res. Lett.* **34**, L07701. (doi:10.1029/2006GL028946)
4. Malhi Y, Aragão LEOC, Galbraith D, Huntingford C, Fisher R, Zelazowski P, Sitch S, Mcsweeney C, Meir P. 2009 Exploring the likelihood and mechanism of a climate-change-induced dieback of the. *Proc. Natl. Acad. Sci. U. S. A.* **106**, 20610–20615.
